# Supplementary material for: Comprehensive ECG reference intervals in C57BL/6N substrains provide a generalizable guide for cardiac electrophysiology studies in mice
Source: PubMed Central journal article supplement (PMC10290602; doi:10.1007/s00335-023-09995-y), 2023-06-09

**Supplemental Table 1:**

| Abbreviation      | Parameter Definition                                                         | Unit   |                  |
|-------------------|------------------------------------------------------------------------------|--------|------------------|
| CV                | Coefficient of variation (CV = SD/mean x 100) of the R-R interval            | %      | percent          |
| HR                | Heart rate                                                                   | bpm    | beats per minute |
| HRV               | Heart rate variability                                                       | bpm    | beats per minute |
| mean R-amplitude  | Average (mean) amplitude of the R wave from all R-waves in the measurement   | mV     | millivolt        |
| mean SR-amplitude | Average (mean) amplitude of the SR wave from all SR-waves in the measurement | mV     | millivolt        |
| pNN5              | The fraction of consecutive NN intervals that differ by more than 5 ms       | counts | counts           |
| PQ interval       | Time from the start of the P-wave to the beginning of Q-wave                 | ms     | milliseconds     |
| PR interval       | Time from the start of the P-wave to the peak of the QRS-complex             | ms     | milliseconds     |
| QRS complex       | Duration of the QRS-complex                                                  | ms     | milliseconds     |
| QT interval       | Time from the onset of the Q-wave to the end of the T-wave                   | ms     | milliseconds     |
| QTc               | QT corrected for HR (applying the Mitchell formula)                          | ms     | milliseconds     |
| QTc dispersion    | Maximum QT-interval minus minimum QT-interval corrected for HR               | ms     | milliseconds     |
| rMSSD             | Root Mean Square of Successive Differences                                   | ms     | milliseconds     |
| RR interval       | Interval between successive R-peaks                                          | ms     | milliseconds     |
| ST interval       | End point of S wave to start point of T wave                                 | ms     | milliseconds     |

**Supplemental Table 2:**

|                   |  | <b>FEMALE</b>       |                    |                     |                    |                        |  |                      |
|-------------------|--|---------------------|--------------------|---------------------|--------------------|------------------------|--|----------------------|
|                   |  | <i>Conscious</i>    |                    | <i>Isoflurane</i>   |                    | <i>Tribromoethanol</i> |  |                      |
|                   |  | EA                  | LA                 | EA                  | LA                 | EA                     |  |                      |
| Parameter         |  | mean ± sd (n)       | mean ± sd (n)      | mean ± sd (n)       | mean ± sd (n)      | mean ± sd (n)          |  |                      |
| Heart Rate [bpm]  |  | 753 ± 41.6 (9238)   | 745.8 ± 25.4 (620) | 413 ± 55.8 (2670)   | 439.5 ± 49.5 (693) | 442.4 ± 49.4 (226)     |  | No LA data available |
| PR [ms]           |  | 28.3 ± 3.7 (9240)   | 26.4 ± 4.8 (620)   | 46.9 ± 10.5 (2664)  | 46.2 ± 7.1 (692)   | 49.4 ± 4.1 (225)       |  |                      |
| QRS [ms]          |  | 10.9 ± 1.6 (9238)   | 11.8 ± 1.7 (620)   | 11.2 ± 3.2 (2672)   | 10.7 ± 2.2 (693)   | 13.4 ± 1.8 (217)       |  |                      |
| QT [ms]           |  | 41.8 ± 2.4 (1840)   | 43 ± 2.4 (306)     | 54.5 ± 12.8 (1106)  | 52.5 ± 10 (179)    | 54.7 ± 9.4 (225)       |  |                      |
| RR [ms]           |  | 80.1 ± 5 (9239)     | 80.6 ± 2.8 (619)   | 148.4 ± 22.7 (2670) | 138.4 ± 16.5 (693) | 137.1 ± 16.2 (225)     |  |                      |
| ST [ms]           |  | 29.9 ± 5.2 (8012)   | 32 ± 2.2 (468)     | 42.6 ± 12.8 (713)   | 40.4 ± 8.2 (18)    | 43.8 ± 9.1 (209)       |  |                      |
| QTc Mitchell [ms] |  | 47.2 ± 2.4 (1839)   | 48.1 ± 2.4 (305)   | 43.9 ± 8.6 (1104)   | 44.9 ± 8.4 (179)   | 46.7 ± 6.3 (224)       |  |                      |
|                   |  | <b>MALE</b>         |                    |                     |                    |                        |  |                      |
|                   |  | <i>Conscious</i>    |                    | <i>Isoflurane</i>   |                    | <i>Tribromoethanol</i> |  |                      |
|                   |  | EA                  | LA                 | EA                  | LA                 | EA                     |  |                      |
| Parameter         |  | mean ± sd (n)       | mean ± sd (n)      | mean ± sd (n)       | mean ± sd (n)      | mean ± sd (n)          |  |                      |
| Heart Rate [bpm]  |  | 758.9 ± 39.7 (9237) | 750.3 ± 24.8 (588) | 419.8 ± 61.4 (2598) | 443 ± 60.2 (610)   | 422.7 ± 57.7 (220)     |  | No LA data available |
| PR [ms]           |  | 28.1 ± 3.5 (9238)   | 26.3 ± 4.8 (589)   | 44.8 ± 8.4 (2590)   | 44.8 ± 6 (600)     | 48 ± 3.6 (219)         |  |                      |
| QRS [ms]          |  | 10.8 ± 1.6 (9237)   | 11.9 ± 1.7 (588)   | 11.1 ± 3.4 (2598)   | 10.6 ± 2.5 (610)   | 13.5 ± 1.7 (214)       |  |                      |
| QT [ms]           |  | 41.6 ± 2.3 (1825)   | 43.1 ± 2.4 (296)   | 55.1 ± 12.7 (1140)  | 51.4 ± 7.8 (185)   | 56.7 ± 8.4 (219)       |  |                      |
| RR [ms]           |  | 79.4 ± 4.8 (9238)   | 80.1 ± 2.8 (588)   | 146.3 ± 23.8 (2597) | 138.1 ± 19.6 (610) | 144.5 ± 18.9 (220)     |  |                      |
| ST [ms]           |  | 29.8 ± 5.2 (8003)   | 32 ± 2.1 (439)     | 44.1 ± 13.4 (741)   | 38.5 ± 1.9 (17)    | 46.4 ± 8.3 (206)       |  |                      |
| QTc Mitchell [ms] |  | 47.2 ± 2.4 (1825)   | 48.3 ± 2.3 (295)   | 45.2 ± 8.3 (1140)   | 45.5 ± 6.8 (185)   | 47.3 ± 6.1 (219)       |  |                      |

### Supplemental Table 3:

| Combined FEMALE and MALE |                    |                    |                     |                     |                     |                      |  |
|--------------------------|--------------------|--------------------|---------------------|---------------------|---------------------|----------------------|--|
| Conscious                |                    | Isoflurane         |                     | Tribromoethanol     |                     |                      |  |
| Parameter                | EA                 | LA                 | EA                  | LA                  | EA                  |                      |  |
|                          | median [95% range] | median [95% range] | median [95% range]  | median [95% range]  | median [95% range]  |                      |  |
| Heart Rate [bpm]         | 762 [653.9;817.6]  | 750 [700.1;792.9]  | 419 [295;524.1]     | 441.4 [335.2;540.3] | 430 [334.3;558.2]   | No LA data available |  |
| PR [ms]                  | 28.6 [20.4;35.5]   | 26 [18.2;35]       | 43.8 [30.7;68.7]    | 45.6 [31.2;56.7]    | 48.4 [41.6;57.4]    |                      |  |
| QRS [ms]                 | 10.7 [8.3;14.7]    | 11.8 [8.4;15.7]    | 10 [7;18.7]         | 10.1 [7.1;16.8]     | 13.3 [10.8;17]      |                      |  |
| QT [ms]                  | 41.9 [36.5;45.7]   | 43.3 [37.8;46.4]   | 52.4 [36.2;87.8]    | 51.6 [30.3;70.4]    | 54.3 [41.6;75.8]    |                      |  |
| RR [ms]                  | 78.8 [73.4;92.3]   | 80 [75.7;86.1]     | 143.3 [114.5;203.3] | 135.9 [111.1;179.5] | 139.5 [107.4;178.3] |                      |  |
| ST [ms]                  | 30.7 [12.8;35.7]   | 32.2 [27;35.3]     | 40.3 [24.8;78.6]    | 38.7 [32.1;58.3]    | 43.7 [30.7;64.8]    |                      |  |
| QTc Mitchell [ms]        | 47.4 [41.8;51.1]   | 48.6 [42.6;51.7]   | 42.9 [31.1;64.9]    | 45.3 [28.6;60.8]    | 45.8 [36.8;61.5]    |                      |  |
|                          | mean ± sd (n)      | mean ± sd (n)      | mean ± sd (n)       | mean ± sd (n)       | mean ± sd (n)       | No LA data available |  |
| Heart Rate [bpm]         | 756 ± 40.8 (18475) | 748 ± 25.2 (1208)  | 416.4 ± 58.7 (5268) | 441.2 ± 54.8 (1303) | 432.7 ± 54.5 (446)  |                      |  |
| PR [ms]                  | 28.2 ± 3.6 (18478) | 26.4 ± 4.8 (1209)  | 45.9 ± 9.6 (5254)   | 45.6 ± 6.6 (1292)   | 48.7 ± 3.9 (444)    |                      |  |
| QRS [ms]                 | 10.8 ± 1.6 (18475) | 11.8 ± 1.7 (1208)  | 11.2 ± 3.3 (5270)   | 10.7 ± 2.4 (1303)   | 13.4 ± 1.7 (431)    |                      |  |
| QT [ms]                  | 41.7 ± 2.4 (3665)  | 43 ± 2.4 (602)     | 54.8 ± 12.7 (2246)  | 52 ± 9 (364)        | 55.7 ± 8.9 (444)    |                      |  |
| RR [ms]                  | 79.7 ± 4.9 (18477) | 80.4 ± 2.8 (1207)  | 147.4 ± 23.3 (5267) | 138.3 ± 18 (1303)   | 140.8 ± 18 (445)    |                      |  |
| ST [ms]                  | 29.9 ± 5.2 (16015) | 32 ± 2.2 (907)     | 43.3 ± 13.2 (1454)  | 39.5 ± 6 (35)       | 45.1 ± 8.8 (415)    |                      |  |
| QTc Mitchell [ms]        | 47.2 ± 2.4 (3664)  | 48.2 ± 2.3 (600)   | 44.5 ± 8.5 (2244)   | 45.2 ± 7.6 (364)    | 47 ± 6.2 (443)      |                      |  |

### Supplemental Figure 1:

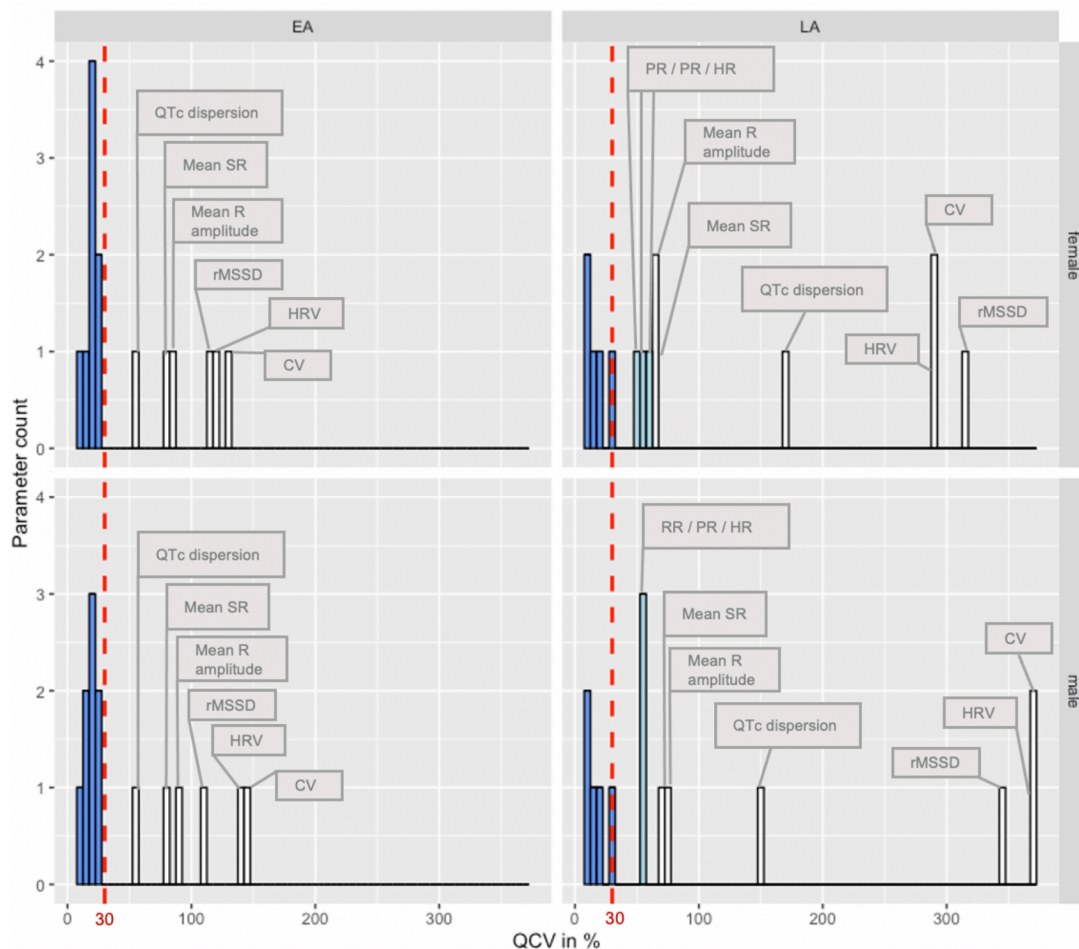

## Supplemental Figure 2:

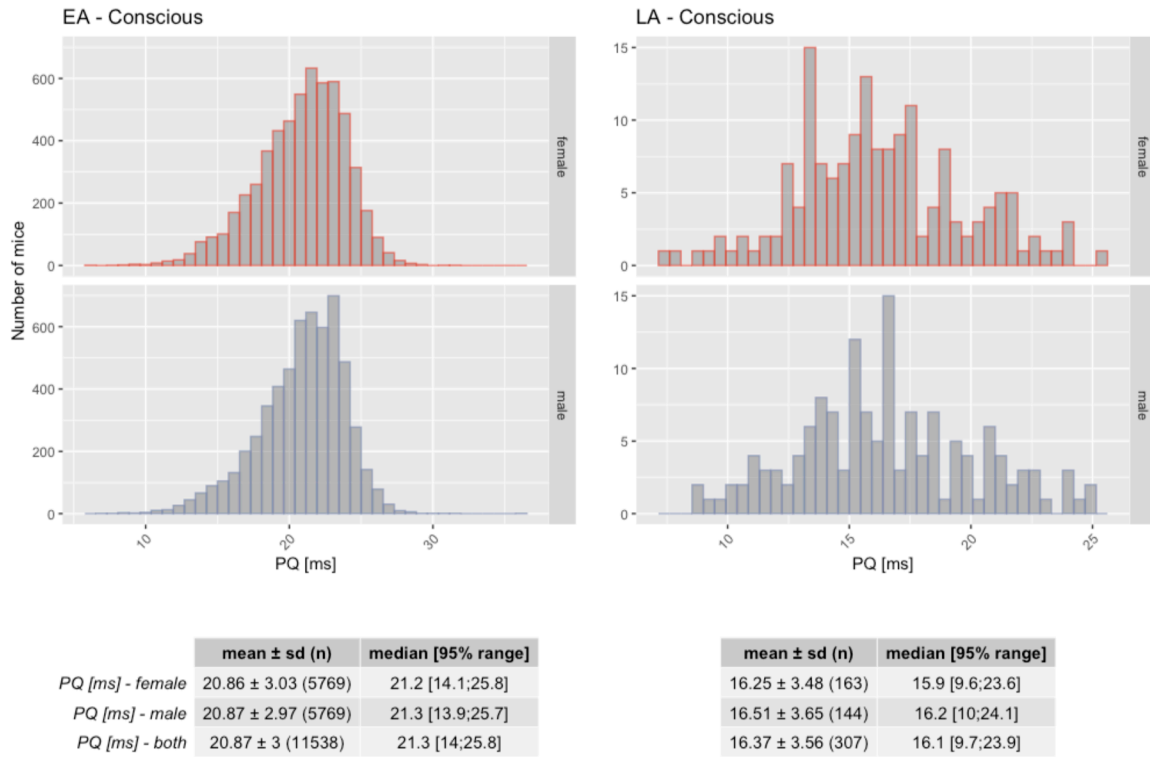

## Supplemental Figure 3:

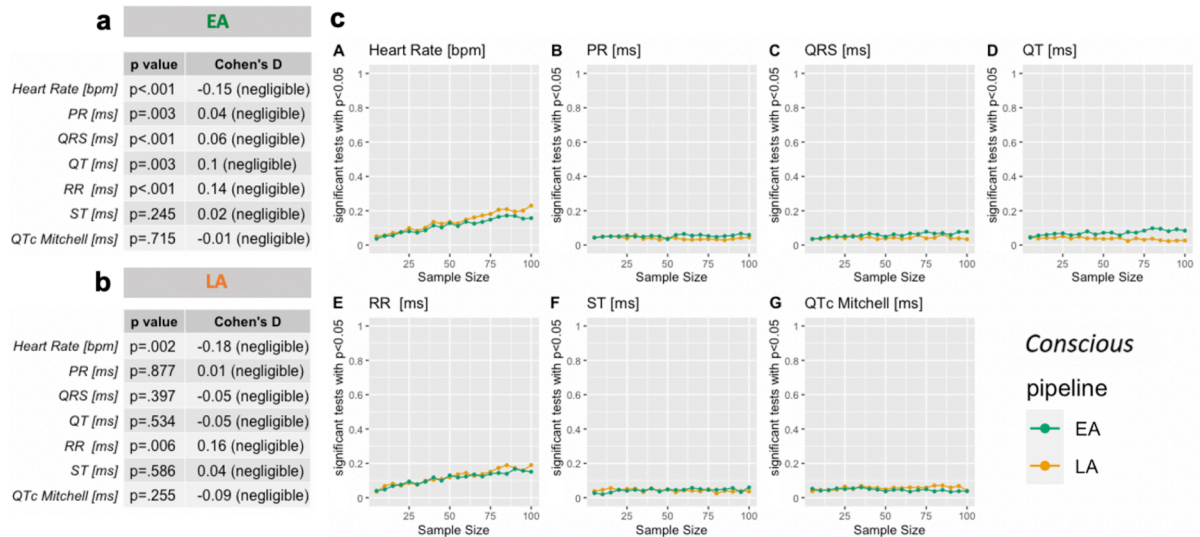

## Supplemental Figure 4:

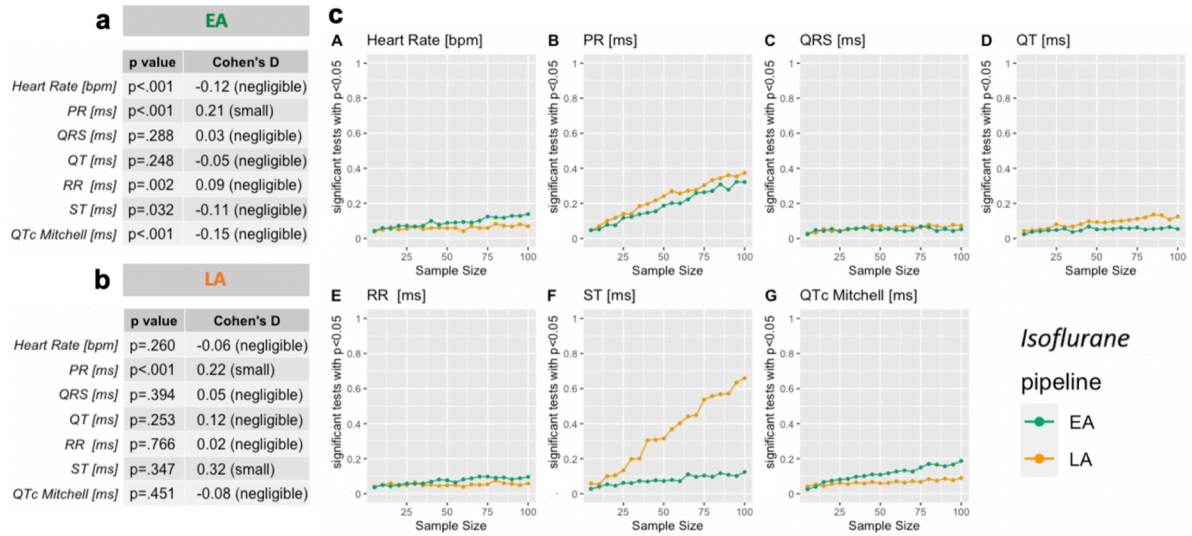

## Supplemental Figure 5:

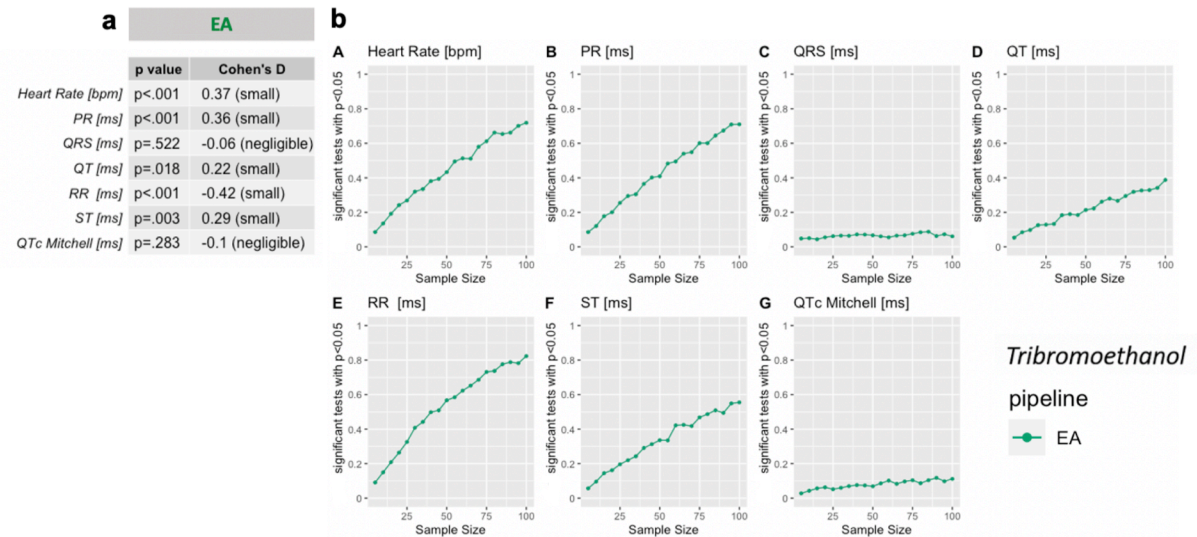

## Supplemental Figure 6:

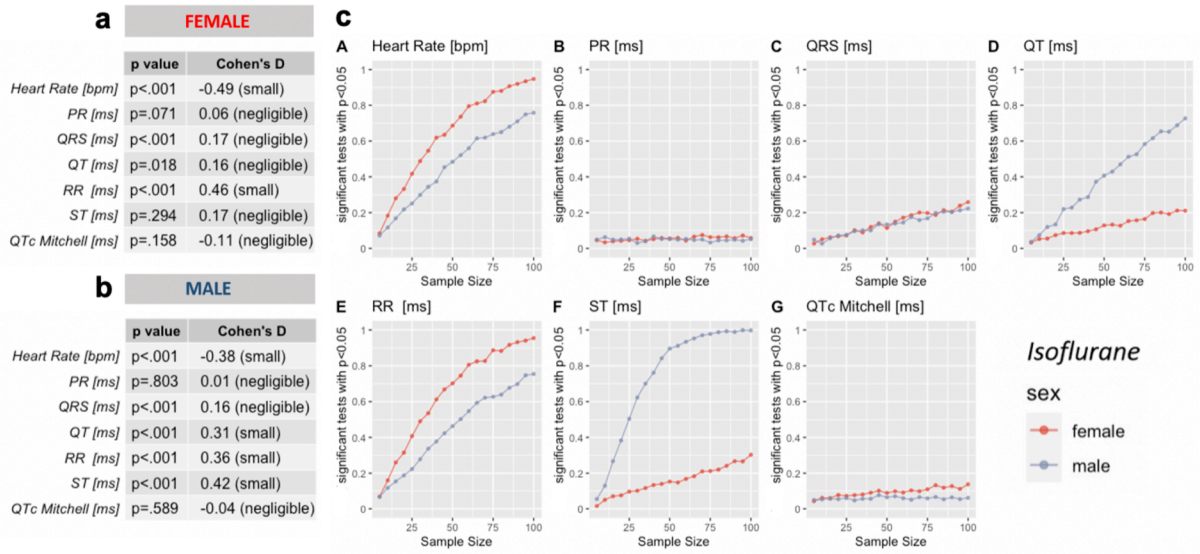

## Supplemental Figure 7:

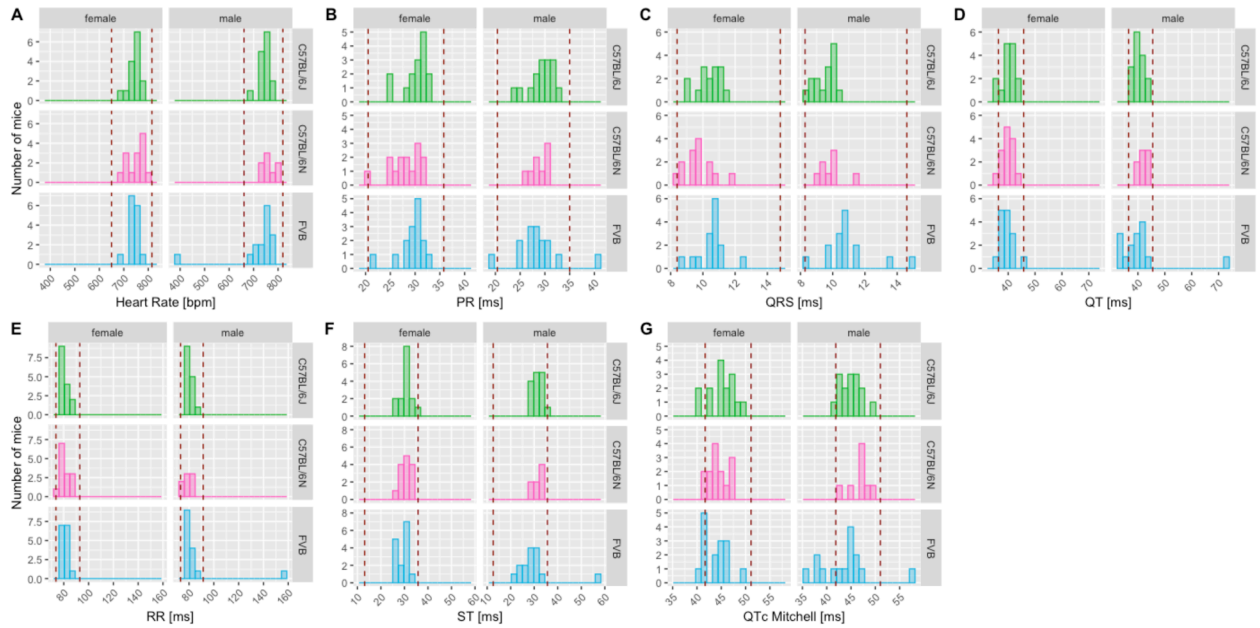



# Supplemental Figure 9:

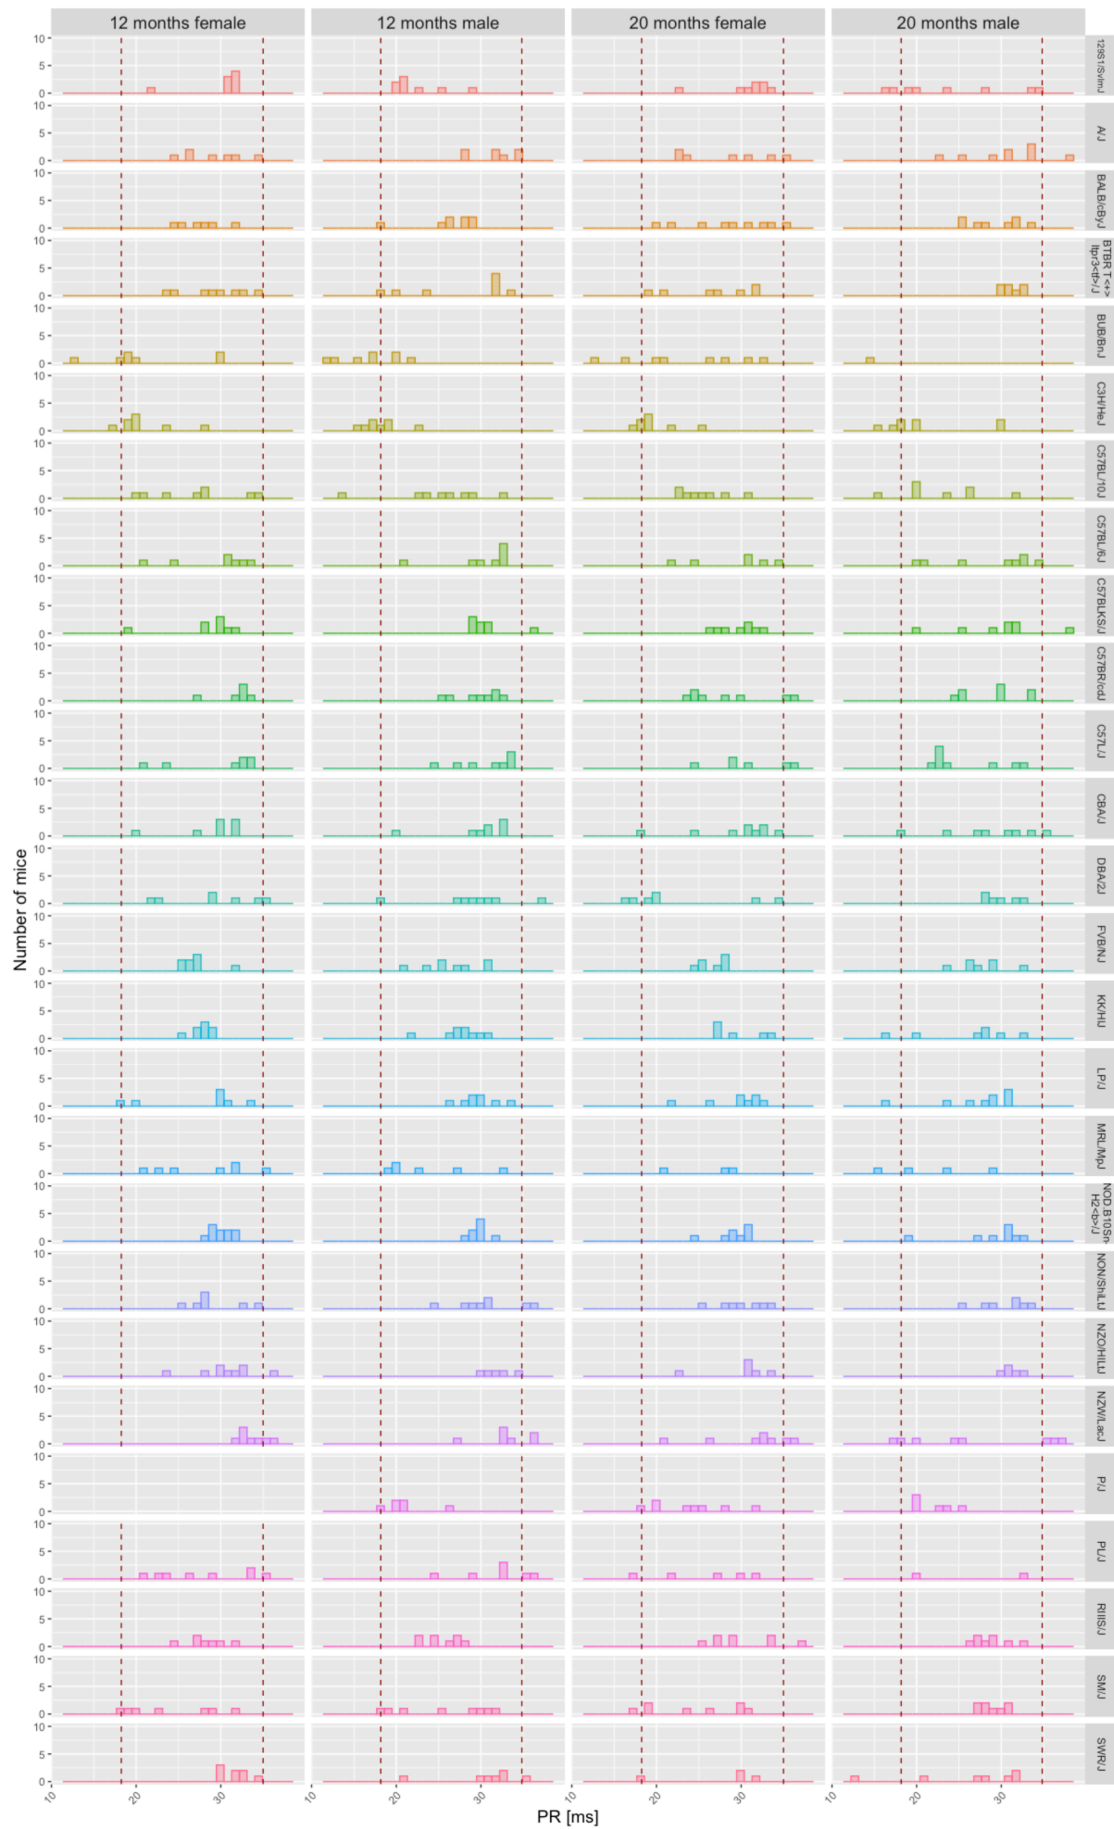

**Supplemental Figure 10:**

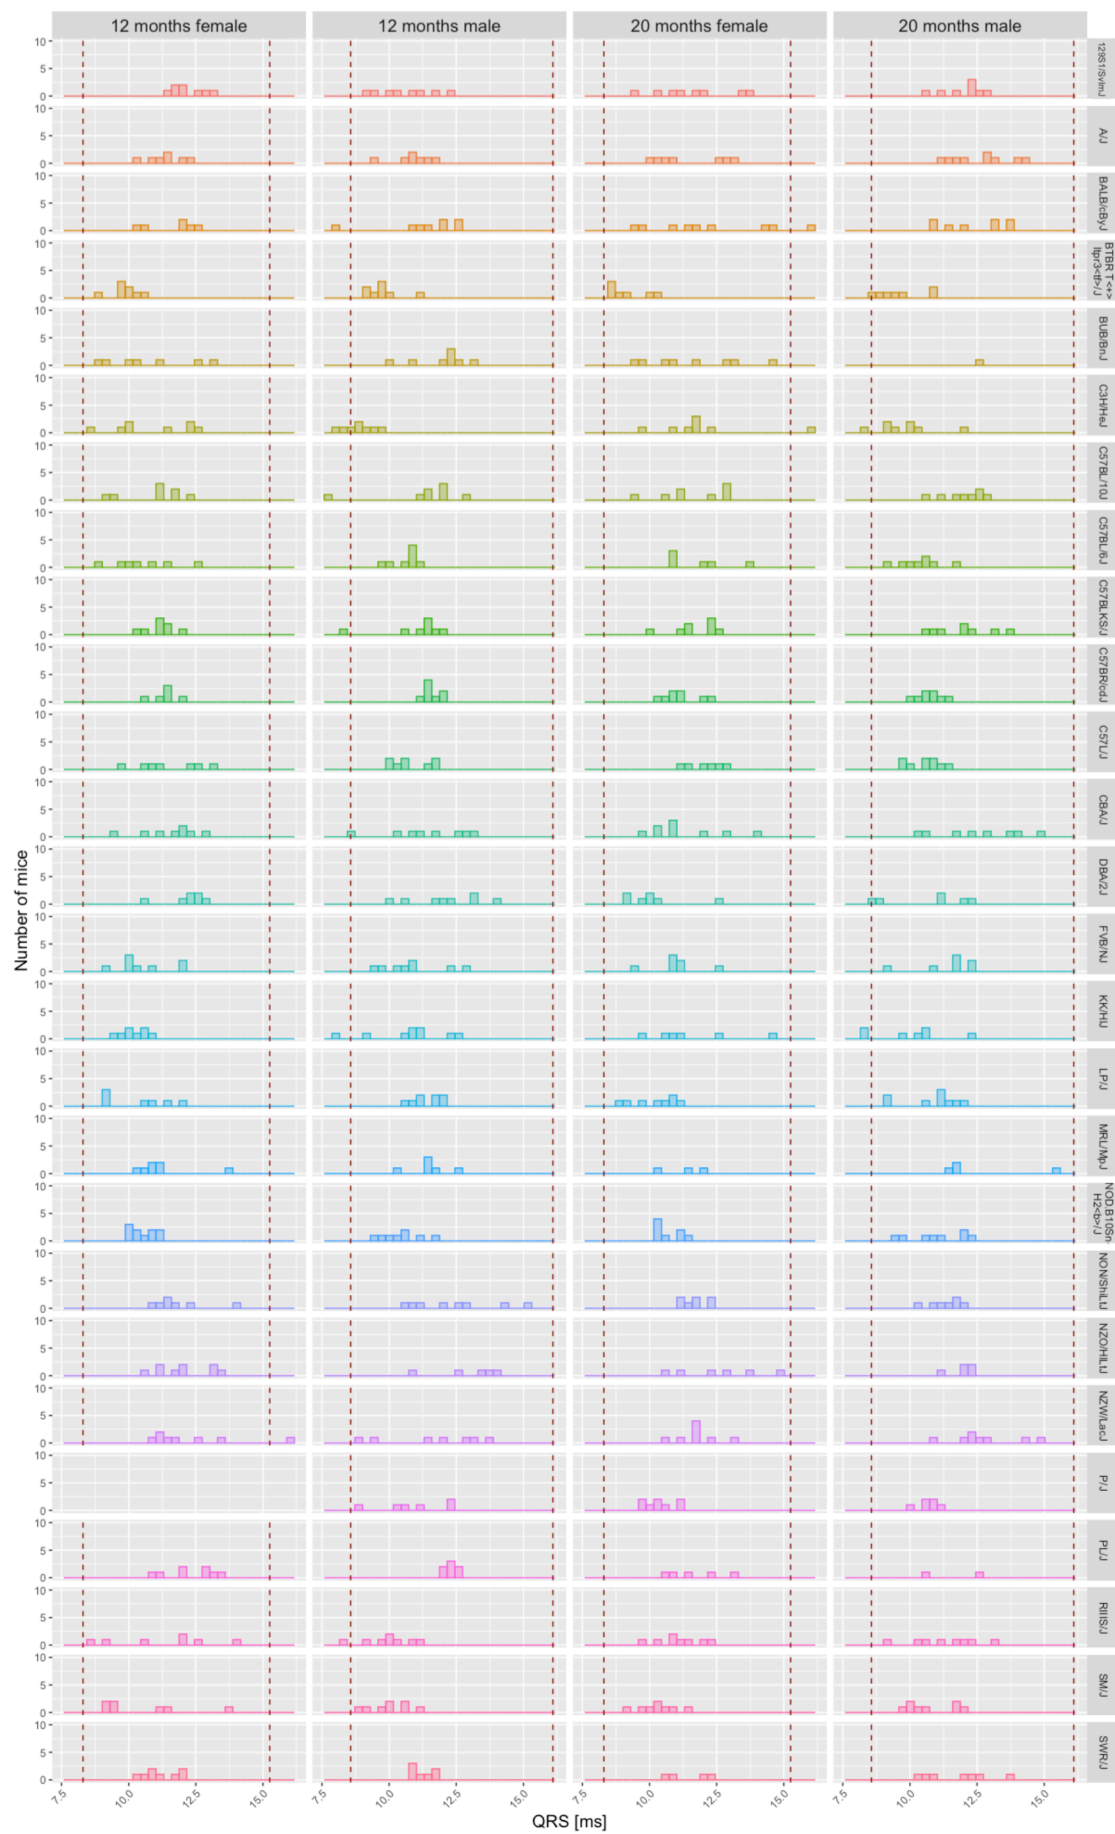



Supplemental Figure 11:

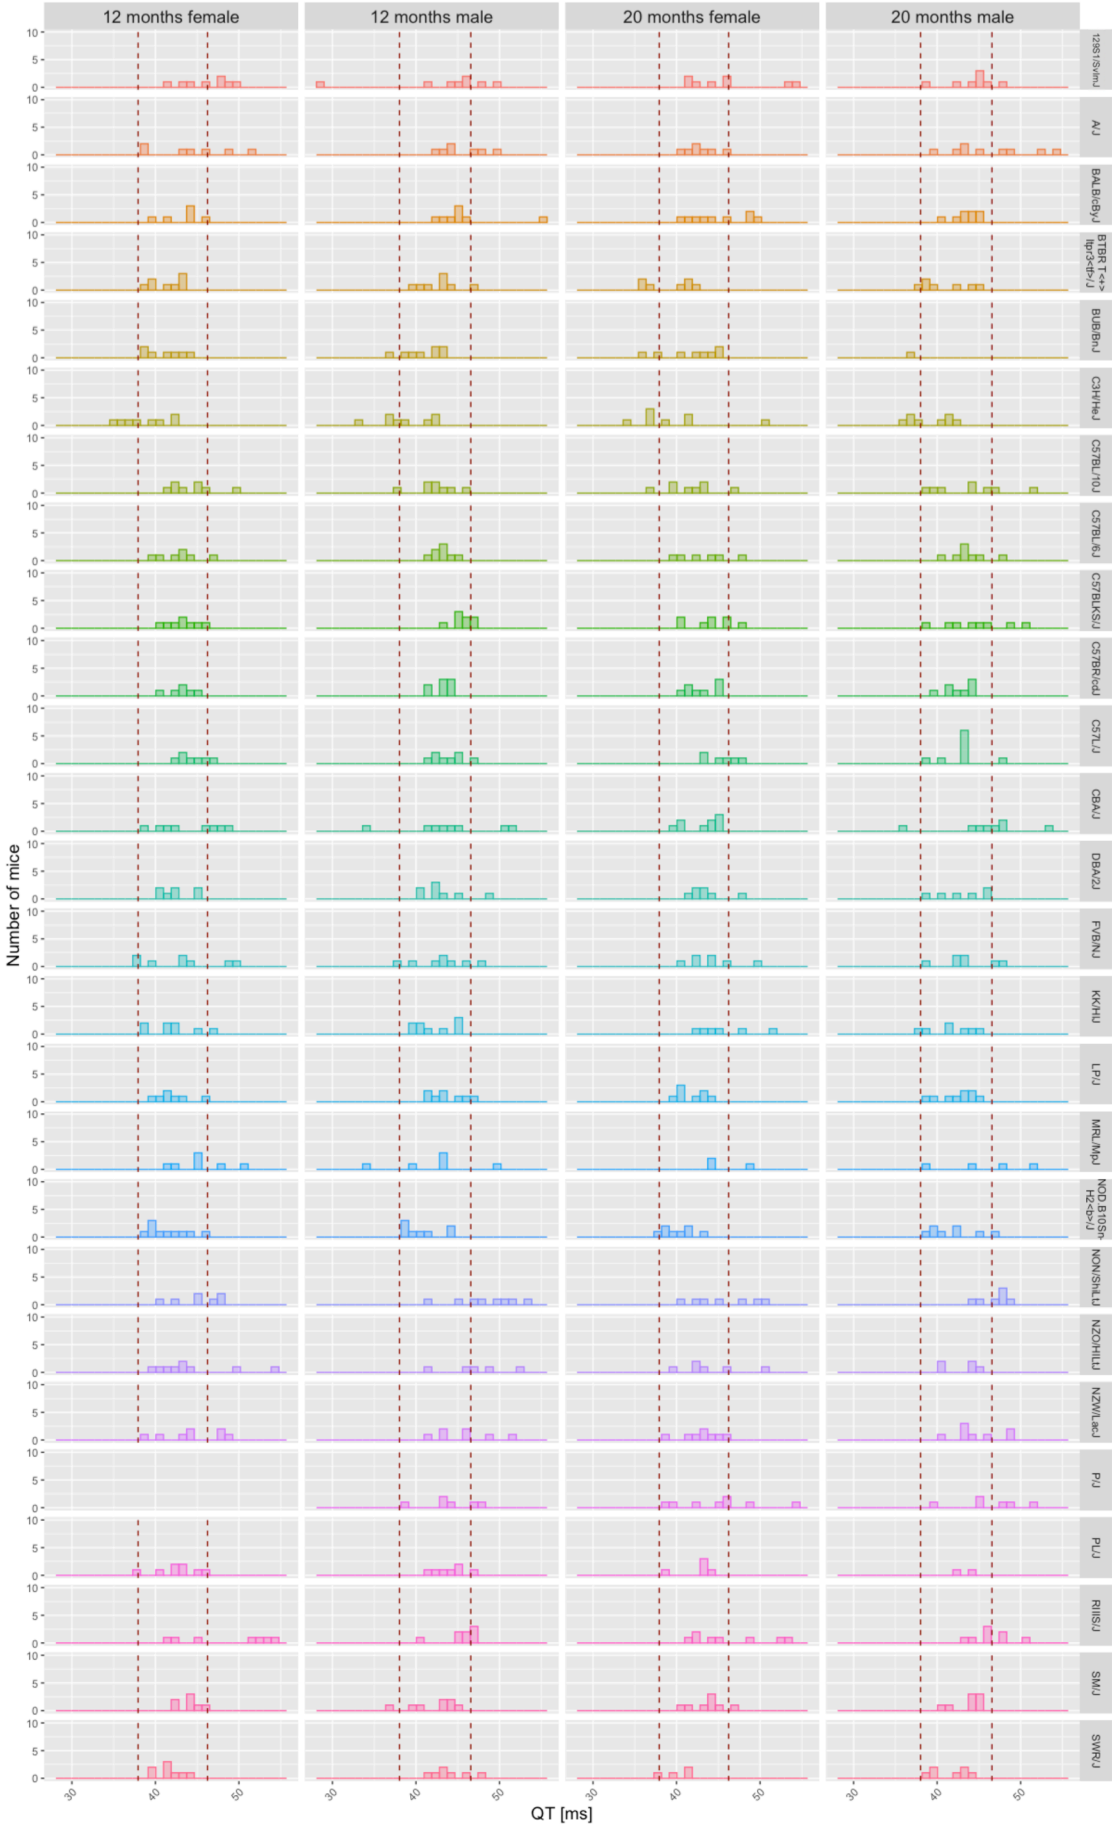

## Supplemental Figure 12:

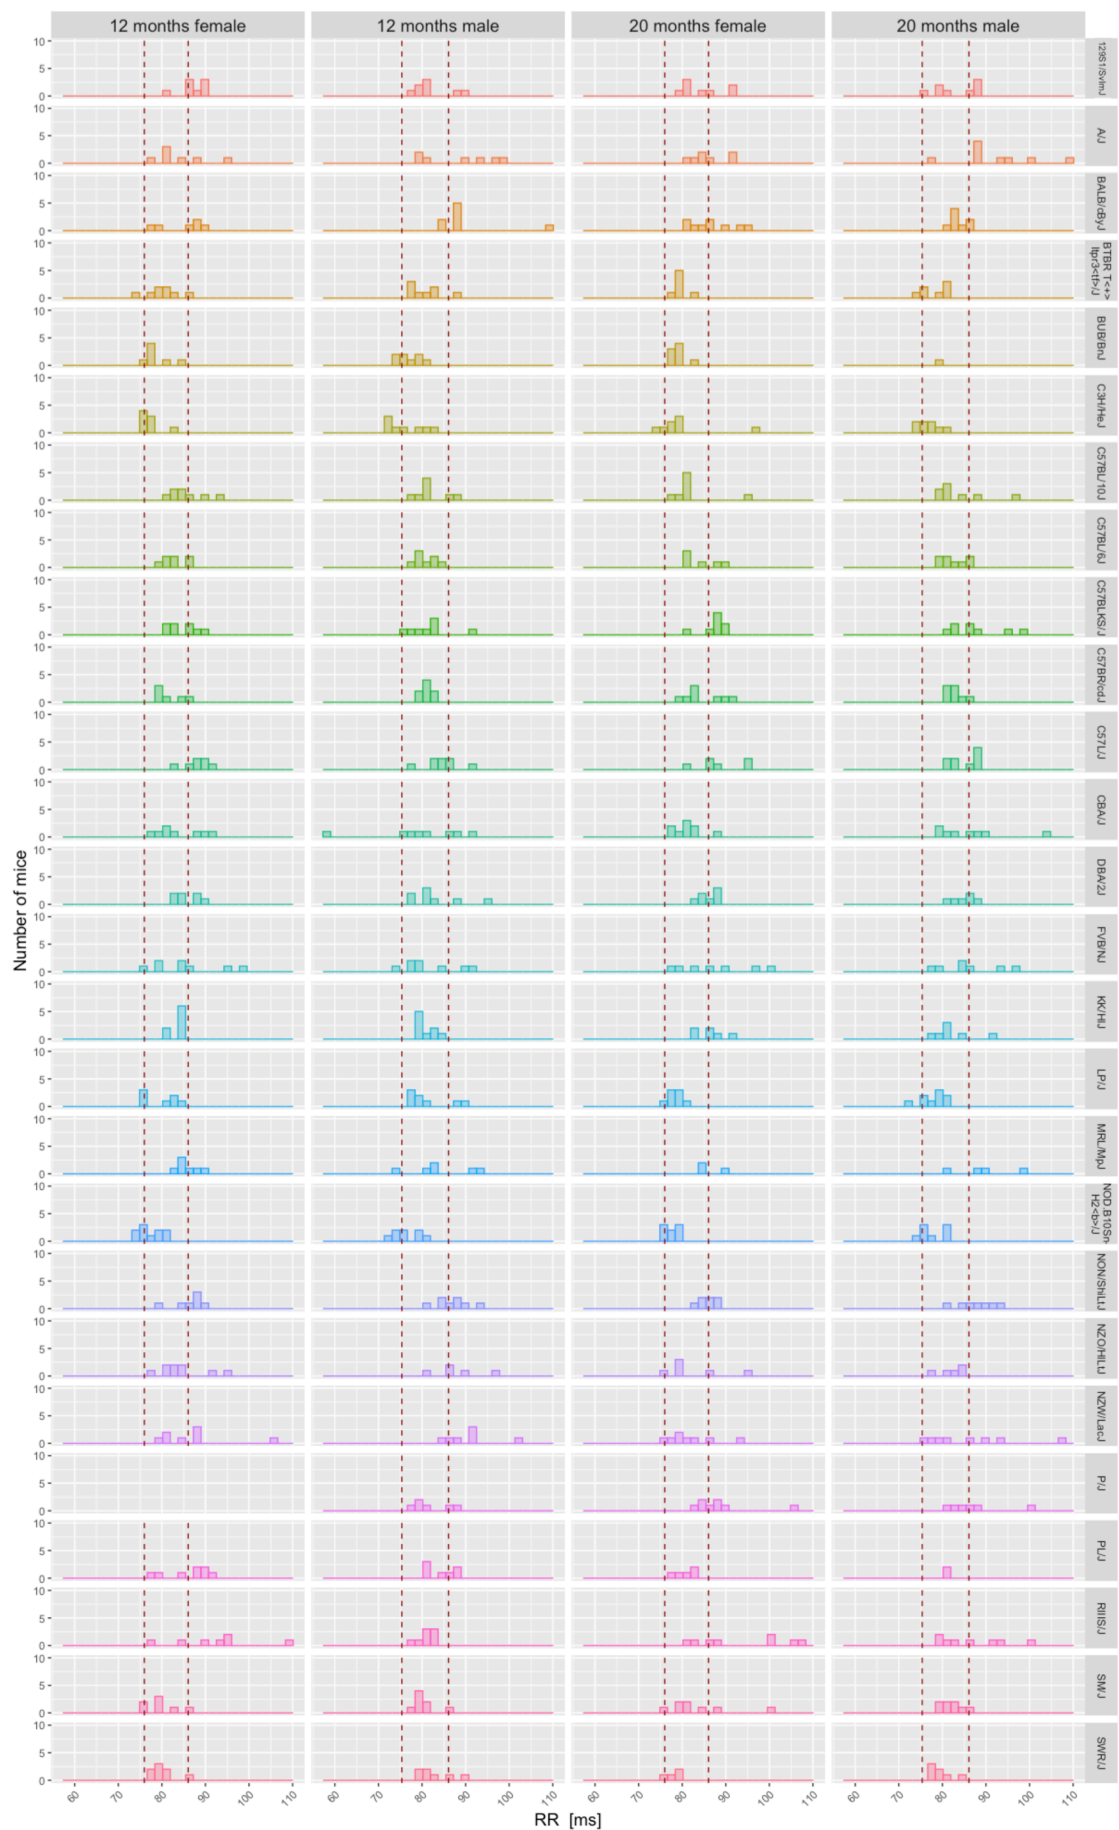

# Supplemental Figure 13:

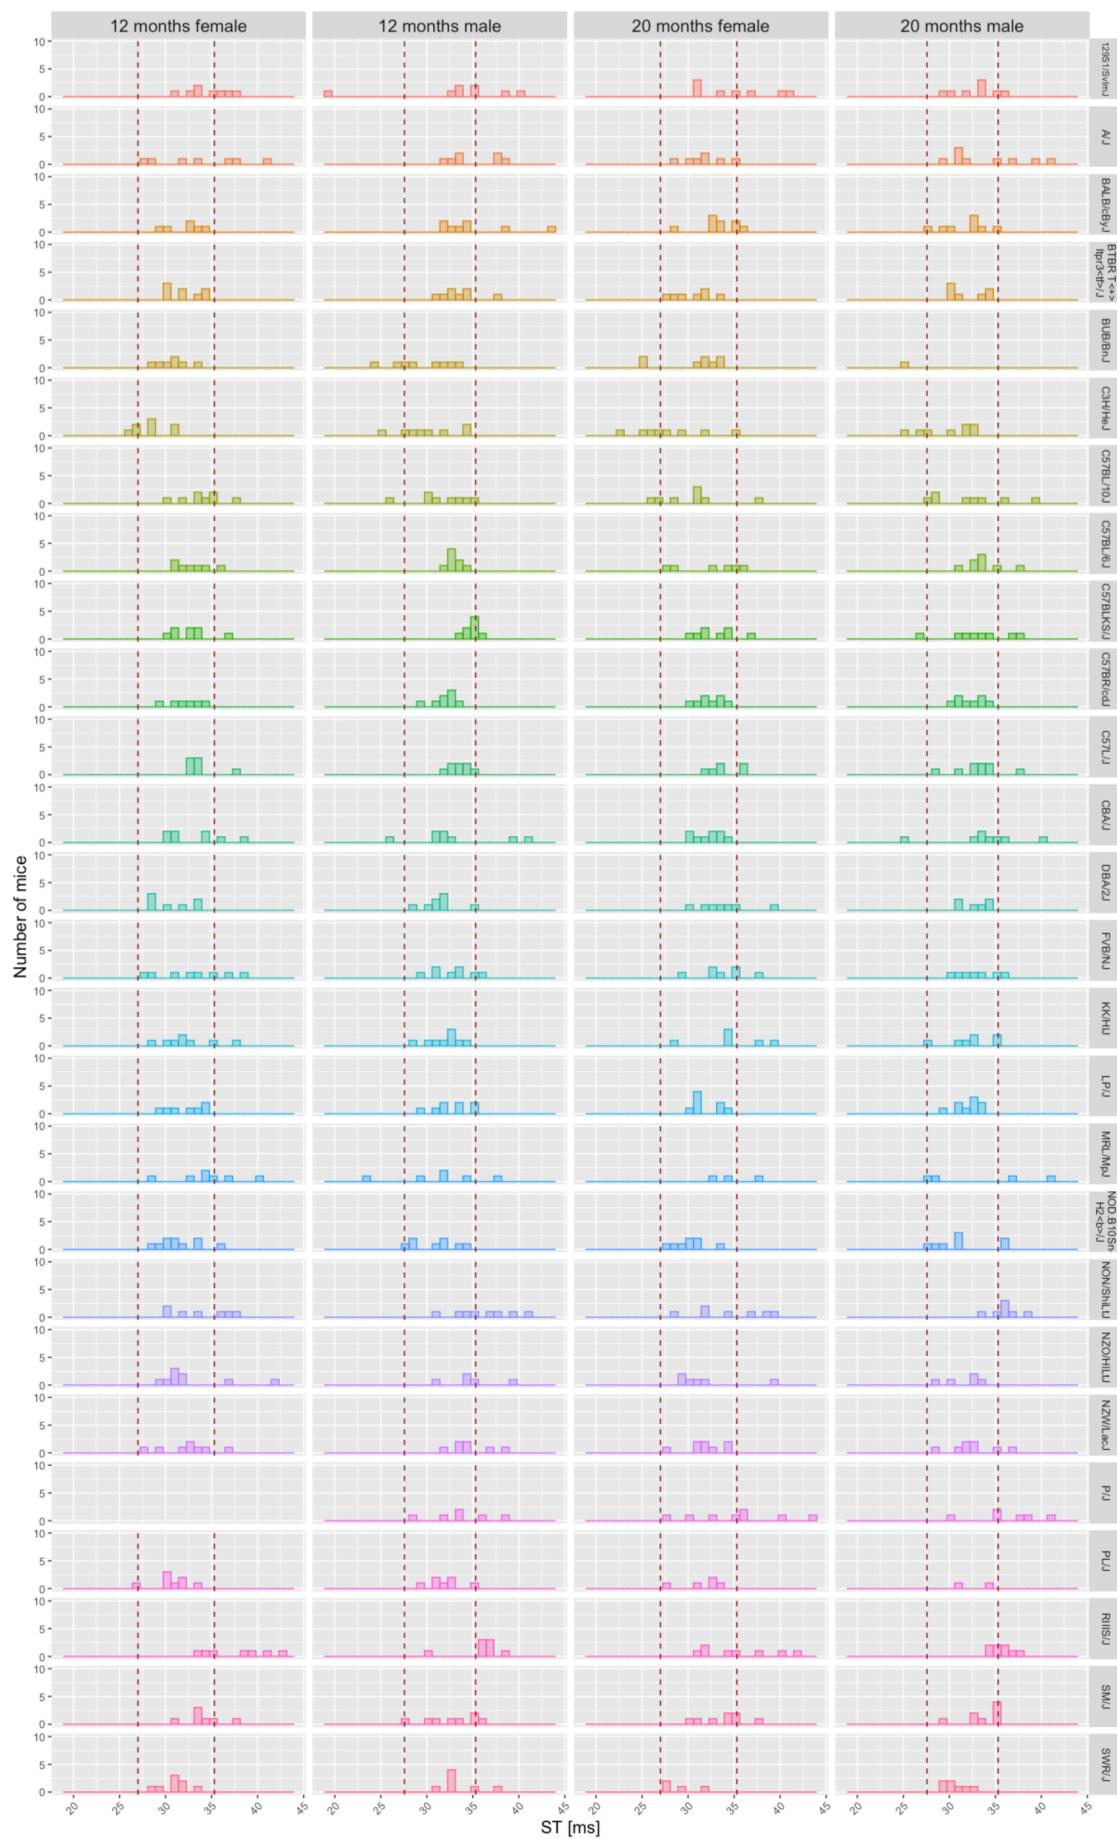

Supplement: 335_2023_9995_MOESM1_ESM.pdf [file 335_2023_9995_MOESM1_ESM.pdf]
